# Supplementary material for: Metabolomic Analysis Reveals Changes in Plasma Metabolites in Response to Acute Cold Stress and Their Relationships to Metabolic Health in Cold-Acclimatized Humans
Source: MDPI journal article supplement (doi:10.3390/metabo11090619), 2021-09-12
Supplement: s1 [file s1]

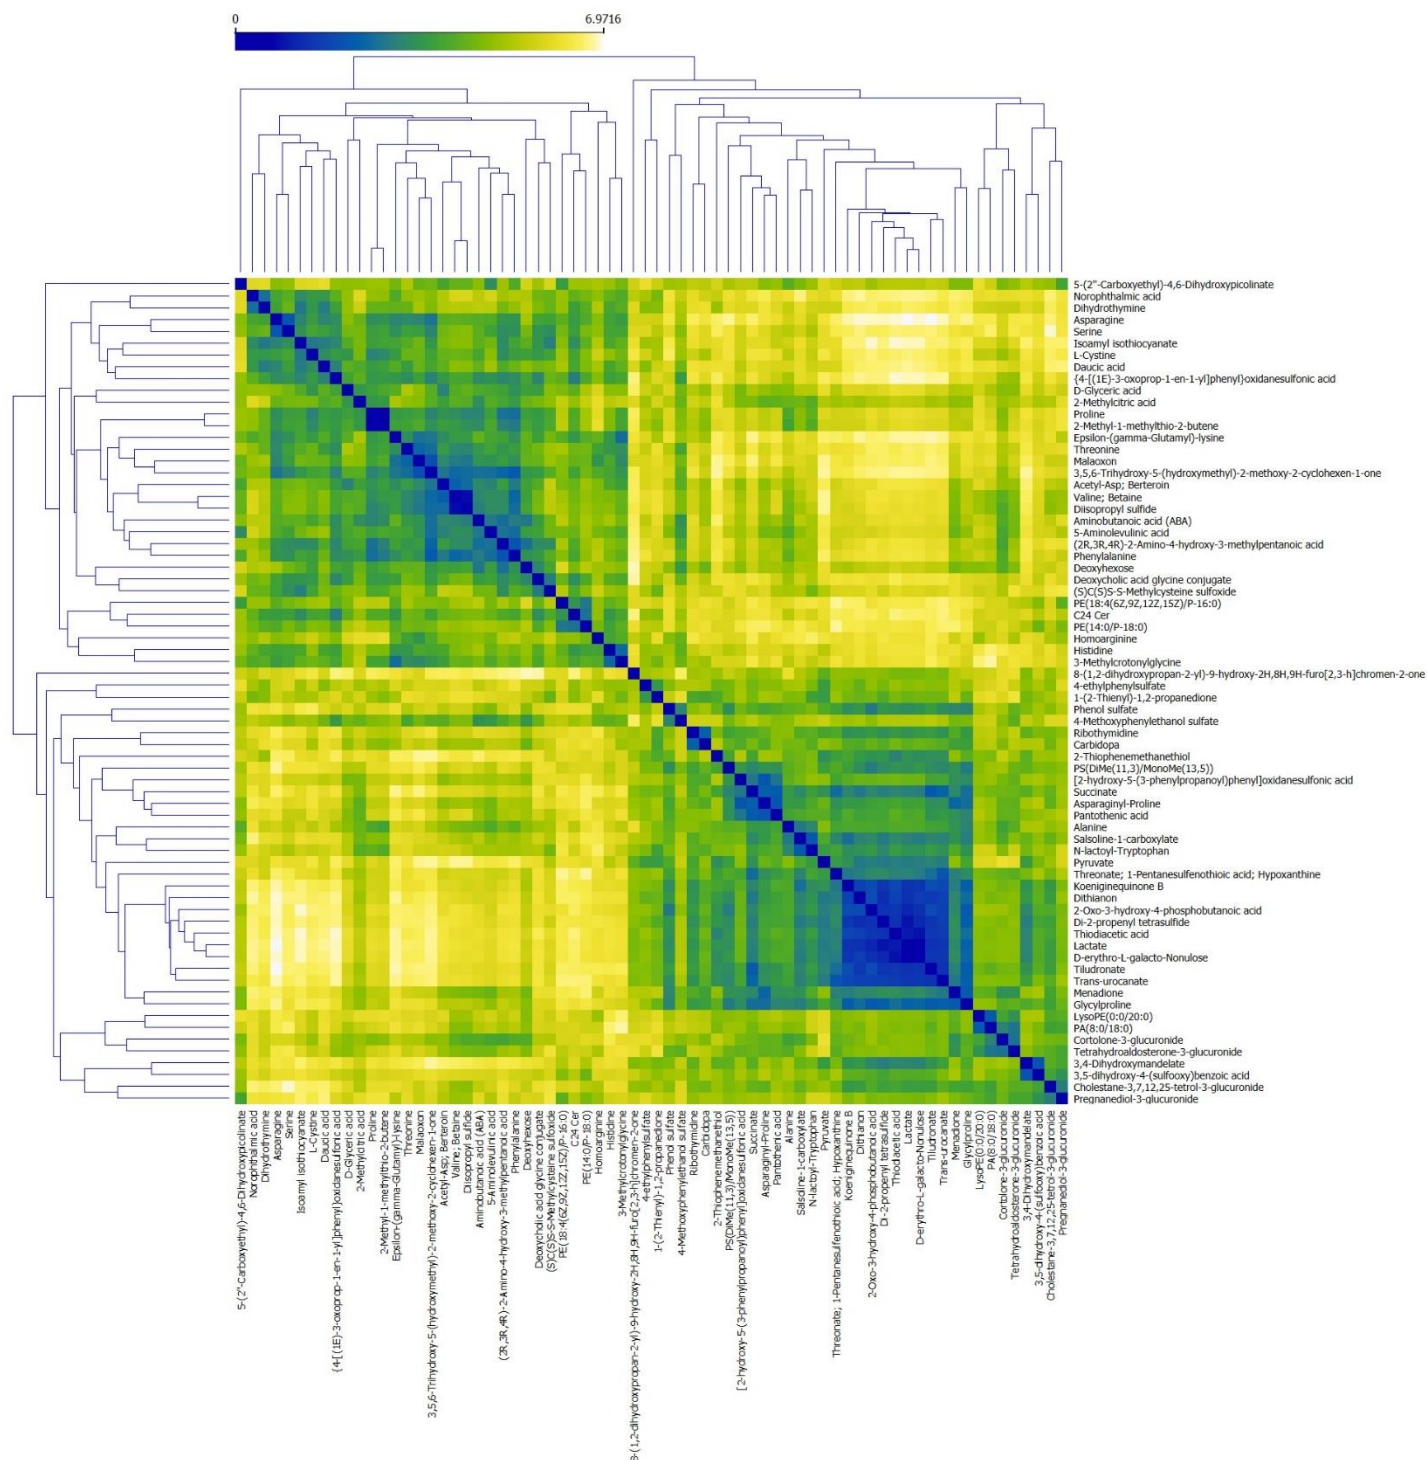

**Figure S1.** Distance map of the clustering of metabolites significantly changed after ice-water swimming (Wilcoxon matched pairs signed-rank test with Benjamini–Hochberg correction for multiple comparison) in plasma from ice-water swimmers.
